# Supplementary material for: [3+2]-Cycloaddition of Nitrile Imines to Parabanic Acid Derivatives – an Approach to Novel Spiroimidazolidinediones
Source: Preprints.org preprint supplement (doi:10.20944/preprints202311.1828.v1), 2023-11-28
Supplement: Supplementary file 1 [file supplementary]

[3+2]-Cycloaddition of Nitrile Imines to Parabanic Acid Derivatives – an Approach to Novel Spiroimidazolidinediones

Juliana V. Kuznetsova1, Varvara T. Tkachenko1, Lada M. Petrovskaya1, Maria E. Filkina1, Dmitry E. Shybanov1, Yuri K. Grishin1, Vitaly A. Roznyatovsky1, Viktor A. Tafeenko1, Anna S. Pestretsova2,3, Vera A. Yakovleva4, Vadim S. Pokrovsky2,4,5, Maxim E. Kukushkin1 and Elena K. Beloglazkina1*

|  |
| --- |

1Department of Chemistry, M.V. Lomonosov Moscow State University, Leninskie Gory, 1-3, 119991 Moscow, Russia

2 Blokhin National Medical Research Center of Oncology, Ministry of Health of the Russian Federation, 115478 Moscow, Russia

3 Occupational Health Risks Lab, Peoples' Friendship University of Russia (RUDN University), 117198 Moscow, Russia

4 Department of biochemistry, People’s Friendship University of Russia (RUDN University), 117198 Moscow, Russia

5 Research Institute of Molecular and Cellular Medicine, People’s Friendship University of Russia (RUDN University), 117198 Moscow, Russia

***** Correspondence: beloglazki@mail.ru

Table of contents

[1H, 13C NMR and HRMS spectral data of imidazolidine-4,5-diones 1a-f 4](#_Toc152053857)

[1,3-Diphenylimidazolidine-2,4,5-trione (1a) 4](#_Toc152053858)

[Ethyl 2-(2,4,5-trioxo-3-phenylimidazolidin-1-yl)acetate (1b) 5](#_Toc152053859)

[1,3-Diphenyl-2-thioxoimidazolidine-4,5-dione (1c) 6](#_Toc152053860)

[Ethyl 2-(3-(4-ethoxyphenyl)-4,5-dioxo-2-thioxoimidazolidin-1-yl)acetate (1d) 7](#_Toc152053861)

[Ethyl 2-(3-(4-methoxyphenyl)-4,5-dioxo-2-thioxoimidazolidin-1-yl)acetate (1e) 8](#_Toc152053862)

[1-Allyl-2-thioxoimidazolidine-4,5-dione (1f) 9](#_Toc152053863)

[1H, 13C NMR and HRMS spectral data of 5-aryliminoimidazolidine-4,5-diones 2a-m 10](#_Toc152053864)

[(*E*)-5-((4-Chlorophenyl)imino)-1,3-diphenylimidazolidine-2,4-dione (2a) 10](#_Toc152053865)

[(*E*)-5-((2-Chlorophenyl)imino)-1,3-diphenylimidazolidine-2,4-dione (2b) 11](#_Toc152053866)

[(*E*)-5-((4-Bromophenyl)imino)-1,3-diphenylimidazolidine-2,4-dione (2c) 12](#_Toc152053867)

[(*E*)-5-((2-Bromophenyl)imino)-1,3-diphenylimidazolidine-2,4-dione (2d) 13](#_Toc152053868)

[(*E*)-1,3-Diphenyl-5-(p-tolylimino)imidazolidine-2,4-dione (2e) 14](#_Toc152053869)

[(*E*)-5-((4-Methoxyphenyl)imino)-1,3-diphenylimidazolidine-2,4-dione (2f) 15](#_Toc152053870)

[(*E*)-5-((4-Nitrophenyl)imino)-1,3-diphenylimidazolidine-2,4-dione (2g) 16](#_Toc152053871)

[(*E*)-5-((4-bromophenyl)imino)-1,3-diphenyl-2-thioxoimidazolidin-4-one (2h) 17](#_Toc152053872)

[(*E*)-5-((4-Methoxyphenyl)imino)-1,3-diphenyl-2-thioxoimidazolidin-4-one (2i) 19](#_Toc152053873)

[(*E*)-5-((4-Nitrophenyl)imino)-1,3-diphenyl-2-thioxoimidazolidin-4-one (2j) 20](#_Toc152053874)

[Ethyl (*E*)-2-(5-((4-bromophenyl)imino)-2,4-dioxo-3-phenylimidazolidin-1-yl)acetate (2k) 21](#_Toc152053875)

[Ethyl (*E*)-2-(4-((4-bromophenyl)imino)-2,5-dioxo-3-phenylimidazolidin-1-yl)acetate (2l) 22](#_Toc152053876)

[1H, 13C NMR and HRMS spectral data of 4-thia-1,2,6,9-tetraazaspiro[4.4]non-2-ene-7,8-diones 4a-g 23](#_Toc152053877)

[3-(4-Chloro-3-nitrophenyl)-1,6,9-triphenyl-4-thia-1,2,6,9-tetraazaspiro[4.4]non-2-ene-7,8-dione (4a) 23](#_Toc152053878)

[1-(4-Nitrophenyl)-3,6,9-triphenyl-4-thia-1,2,6,9-tetraazaspiro[4.4]non-2-ene-7,8-dione (4b) 24](#_Toc152053879)

[3-(4-Bromophenyl)-1,6,9-triphenyl-4-thia-1,2,6,9-tetraazaspiro[4.4]non-2-ene-7,8-dione (4c) 25](#_Toc152053880)

[3-Methyl-1,6,9-triphenyl-4-thia-1,2,6,9-tetraazaspiro[4.4]non-2-ene-7,8-dione (4d) 26](#_Toc152053881)

[Ethyl 2-(3-(4-bromophenyl)-9-(4-ethoxyphenyl)-7,8-dioxo-1-phenyl-4-thia-1,2,6,9-tetraazaspiro[4.4]non-2-en-6-yl)acetate (4e) 28](#_Toc152053882)

[Ethyl 2-(9-(4-methoxyphenyl)-1-(4-nitrophenyl)-7,8-dioxo-3-phenyl-4-thia-1,2,6,9-tetraazaspiro[4.4]non-2-en-6-yl)acetate (4f) 29](#_Toc152053883)

[6-Allyl-1-(4-nitrophenyl)-3-phenyl-4-thia-1,2,6,9-tetraazaspiro[4.4]non-2-ene-7,8-dione (4g) 30](#_Toc152053884)

[1H, 13C NMR and HRMS spectral data of 1,2,4,6,8-pentaazaspiro[4.4]non-2-ene-7,9-diones 5a-n 31](#_Toc152053885)

[4-(4-Bromophenyl)-1,3,6,8-tetraphenyl-1,2,4,6,8-pentaazaspiro[4.4]non-2-ene-7,9-dione (5a) 31](#_Toc152053886)

[1,4-Bis(4-nitrophenyl)-6,8-diphenyl-3-(p-tolyl)-1,2,4,6,8-pentaazaspiro[4.4]non-2-ene-7,9-dione (5b) 32](#_Toc152053887)

[4-(4-Bromophenyl)-1-(4-nitrophenyl)-6,8-diphenyl-3-(p-tolyl)-1,2,4,6,8-pentaazaspiro[4.4]non-2-ene-7,9-dione (5c) 33](#_Toc152053888)

[4-(2-Bromophenyl)-1-(4-nitrophenyl)-6,8-diphenyl-3-(p-tolyl)-1,2,4,6,8-pentaazaspiro[4.4]non-2-ene-7,9-dione (5d) 34](#_Toc152053889)

[4-(2-Chlorophenyl)-1-(4-nitrophenyl)-6,8-diphenyl-3-(p-tolyl)-1,2,4,6,8-pentaazaspiro[4.4]non-2-ene-7,9-dione (5e) 36](#_Toc152053890)

[1-(4-Nitrophenyl)-6,8-diphenyl-3,4-di-p-tolyl-1,2,4,6,8-pentaazaspiro[4.4]non-2-ene-7,9-dione (5f) 37](#_Toc152053891)

[4-(4-Methoxyphenyl)-1-(4-nitrophenyl)-6,8-diphenyl-3-(p-tolyl)-1,2,4,6,8-pentaazaspiro[4.4]non-2-ene-7,9-dione (5g) 38](#_Toc152053892)

[4-(4-Bromophenyl)-1-(4-nitrophenyl)-3,6,8-triphenyl-1,2,4,6,8-pentaazaspiro[4.4]non-2-ene-7,9-dione (5h) 39](#_Toc152053893)

[4-(4-Methoxyphenyl)-1-(4-nitrophenyl)-3,6,8-triphenyl-1,2,4,6,8-pentaazaspiro[4.4]non-2-ene-7,9-dione (5i) 40](#_Toc152053894)

[3-(4-Chlorophenyl)-1,6,8-triphenyl-4-(p-tolyl)-1,2,4,6,8-pentaazaspiro[4.4]non-2-ene-7,9-dione (5j) 41](#_Toc152053895)

[3-Methyl-4-(4-nitrophenyl)-1,6,8-triphenyl-1,2,4,6,8-pentaazaspiro[4.4]non-2-ene-7,9-dione (5k) 42](#_Toc152053896)

[4-(4-Bromophenyl)-3-methyl-1,6,8-triphenyl-1,2,4,6,8-pentaazaspiro[4.4]non-2-ene-7,9-dione (5l) 43](#_Toc152053897)

[Ethyl 2-(4-(4-bromophenyl)-1-(4-nitrophenyl)-7,9-dioxo-3,8-diphenyl-1,2,4,6,8-pentaazaspiro[4.4]non-2-en-6-yl)acetate (5m) 45](#_Toc152053898)

[Ethyl 2-(4-(4-bromophenyl)-1-(4-nitrophenyl)-7,9-dioxo-3,6-diphenyl-1,2,4,6,8-pentaazaspiro[4.4]non-2-en-8-yl)acetate (5n) 46](#_Toc152053899)

[1H NMR spectral data of compounds 5 and 6 47](#_Toc152053900)

[(Z)-3-Phenyl-2-(phenylimino)thiazolidine-4,5-dione (5) 47](#_Toc152053901)

[(Z)-3-(4-nitrophenyl)-N,5-diphenyl-1,3,4-thiadiazol-2(3H)-imine (6) 49](#_Toc152053902)

[IR spectral data of 1c, 2i, 2j and 5 50](#_Toc152053903)

[1,3-Diphenyl-2-thioxoimidazolidine-4,5-dione (1c) 50](#_Toc152053904)

[5-((4-Methoxyphenyl)imino)-1,3-diphenyl-2-thioxoimidazolidin-4-one (2i) 51](#_Toc152053905)

[5-((4-Nitrophenyl)imino)-1,3-diphenyl-2-thioxoimidazolidin-4-one (2j) 52](#_Toc152053906)

[3-Phenyl-2-(phenylimino)thiazolidine-4,5-dione (5) 53](#_Toc152053907)

[Crystallographic data of 5c, 5g and 5i 54](#_Toc152053908)

# 1H, 13C NMR and HRMS spectral data of **imidazolidine-4,5-diones 1a-f**

## 1,3-Diph**enylimidazolidine-2,4,5-trione (1a)**

1H NMR (400 MHz, CDCl3) δ 7.57 – 7.52 (m, 4H, Ar), 7.51 – 7.45 (m, 6H, Ar).

## Ethyl 2-(2,4,5-trioxo-3-phenylimidazolidin-1-yl)acetate (1b)

1H NMR (400 MHz, CDCl3) δ 7.55 – 7.49 (m, 2H, Ar), 7.48 – 7.41 (m, 3H, Ar), 4.49 (s, 2H, NCH2), 4.28 (q, *J* = 7.1 Hz, 2H, COOCH2), 1.32 (t, *J* = 7.1 Hz, 3H, CH3).

13C NMR (101 MHz, CDCl3) δ 166.0, 155.7, 155.3, 152.2, 129.8, 129.6, 129.3, 125.8, 62.7, 40.0, 14.2.

HRMS (ESI): calcd for C13H12N2O5 (M+Na)+ 299.0638, found 299.0637.

## 1,3-Diphenyl-2-thioxoimidazolidine-4,5-dione (1c)

1H NMR (400 MHz, CDCl3) δ 7.59 – 7.50 (m, 6H, Ar), 7.42 – 7.37 (m, 4H, Ar).

## Ethyl 2-(3-(4-ethoxyphenyl)-4,5-dioxo-2-thioxoimidazolidin-1-yl)acetate (1d)

1H NMR (400 MHz, CDCl3) δ 7.25 – 7.20 (m, 2H, Ar), 7.02 – 6.97 (m, 2H, Ar), 4.76 (s, 2H, NCH2), 4.27 (q, *J* = 7.1 Hz, 2H, COOCH2CH3), 4.07 (q, *J* = 7.0 Hz, 2H, OCH2CH3), 1.44 (t, *J* = 7.0 Hz, 3H, OCH2CH3), 1.31 (t, *J* = 7.2 Hz, 3H, COOCH2CH3).

13C NMR (101 MHz, CDCl3) δ 180.0, 165.9, 160.0, 154.8, 154.4, 129.2, 123.7, 115.3, 63.9, 62.5, 42.7, 14.9, 14.2.

HRMS (ESI): calcd for C15H16N2O5S (M+Na)+ 359.0672, found 359.0675.

## Ethyl 2-(3-(4-methoxyphenyl)-4,5-dioxo-2-thioxoimidazolidin-1-yl)acetate (1e)

1H NMR (400 MHz, CDCl3) δ 7.26 – 7.22 (m, 2H), 7.04 – 6.99 (m, 2H), 4.77 (s, 2H, NCH2), 4.27 (q, *J* = 7.1 Hz, 2H, COOCH2CH3), 3.85 (s, 3H, OCH3), 1.31 (t, *J* = 7.1 Hz, 3H, COOCH2CH3).

13C NMR (101 MHz, CDCl3) δ 179.9, 165.9, 160.6, 154.8, 154.4, 129.2, 123.9, 114.9, 62.6, 55.7, 42.7, 14.2.

HRMS (ESI): calcd for C14H14N2O5S (2M+Na)+ 667.1139, found 667.1138.

## 1-Allyl-2-thioxoimidazolidine-4,5-dione (1f)

1H NMR (400 MHz, CDCl3) δ 9.11 (br.s, 1H, NH), 5.83 (ddt, *J* = 16.4, 10.1, 6.0 Hz, 1H, CH), 5.34 – 5.27 (m, 2H, =CH2), 4.54 (d, *J* = 6.0 Hz, 2H, NCH2).

13C NMR (101 MHz, DMSO) δ 178.0, 155.7, 155.0, 129.3, 120.2, 43.7.

HRMS (ESI): calcd for C6H6N2O2S (M+Na)+ 193.0042, found 193.0042.

# 1H, 13C NMR and HRMS spectral data of 5-arylimino**imidazolidine-4,5-diones 2a-m**

# (*E*)-5-((4-Chlorophenyl)imino)-1,3-diphenylimidazolidine-2,4-dione (2a)

1H NMR (400 MHz, CDCl3) δ 7.57 – 7.51 (m, 4H, Ar), 7.50 – 7.40 (m, 6H, Ar), 7.28 (d, *J* = 8.5 Hz, 2H, Ar), 6.94 (d, *J* = 8.5 Hz, 2H, Ar).

13C NMR (101 MHz, CDCl3) δ 153.3, 152.1, 144.6, 131.4, 131.0, 130.4, 130.2, 129.6, 129.4, 129.3, 128.9, 128.9, 128.8, 127.2, 126.0, 125.9, 121.5.

HRMS (ESI): calcd for C21H14ClN3O2 (M+H)+ 376.0847, found 376.0852.

## (*E*)-5-((2-Chlorophenyl)imino)-1,3-diphenylimidazolidine-2,4-dione (2b)

1H NMR (400 MHz, CDCl3) δ 7.66 (d, J = 7.9 Hz, 2H, Ar), 7.56 (t, J = 7.7 Hz, 2H, Ar), 7.47 (d, J = 4.2 Hz, 5H, Ar), 7.40 (d, J = 8.2 Hz, 2H, Ar), 7.21 (t, J = 7.6 Hz, 1H, Ar), 7.06 (t, J = 7.6 Hz, 1H, Ar), 6.95 (d, J = 8.0 Hz, 1H, Ar).

13C NMR (101 MHz, CDCl3) δ 153.2, 152.1, 144.0, 141.5, 131.3, 130.2, 129.6, 129.4, 129.3, 128.9, 127.2, 127.2, 125.9, 125.4, 120.6.

HRMS (ESI): calcd for C21H14ClN3O2 (2M+Na)+ 773.1441, found 773.1443.

## (*E*)-5-((4-Bromophenyl)imino)-1,3-diphenylimidazolidine-2,4-dione (2c)

1H NMR (400 MHz, CDCl3) δ 7.57 – 7.53 (m, 4H, Ar), 7.51 – 7.45 (m, 5H, Ar), 7.42 (d, *J* = 8.3 Hz, 3H, Ar), 6.87 (d, *J* = 8.2 Hz, 2H, Ar).

13C NMR (101 MHz, CDCl3) δ 153.2, 152.0, 145.1, 139.9, 131.7, 131.4, 130.2, 129.4, 129.3, 128.9, 128.9, 127.2, 125.9, 121.8, 118.1.

HRMS (ESI): calcd for C21H14BrN3O2 (M+H)+ 420.0342, found 420.0344.

## (*E*)-5-((2-Bromophenyl)imino)-1,3-diphenylimidazolidine-2,4-dione (2d)

1H NMR (400 MHz, CDCl3) δ 7.73 (d, *J* = 7.9 Hz, 2H, Ar), 7.63 (d, *J* = 8.0 Hz, 1H, Ar), 7.58 (t, *J* = 7.8 Hz, 2H, Ar), 7.53 – 7.45 (m, 5H, Ar), 7.43 – 7.39 (m, 1H, Ar), 7.29 (t, *J* = 7.6 Hz, 1H, Ar), 7.06 – 6.97 (m, 2H, Ar).

13C NMR (101 MHz, CDCl3) δ 153.0, 145.3, 132.7, 131.3, 130.2, 129.4, 129.3, 128.9, 127.8, 127.2, 125.9, 125.7, 120.4, 114.1.

HRMS (ESI): calcd for C21H14BrN3O2 (M+Na)+ 442.0162, found 442.0167.

## (*E*)-1,3-Diphenyl-5-(p-tolylimino)imidazolidine-2,4-dione (2e)

1H NMR (400 MHz, CDCl3) δ 7.61 – 7.52 (m, 4H, Ar), 7.52 – 7.44 (m, 5H, Ar), 7.43 – 7.38 (m, 1H, Ar), 7.13 (d, *J* = 7.9 Hz, 2H, Ar), 6.92 (d, *J* = 7.9 Hz, 2H, Ar), 2.33 (s, 3H, CH3).

13C NMR (101 MHz, CDCl3) δ 153.2, 143.4, 139.4, 134.8, 130.4, 129.3, 129.2, 128.8, 128.8, 128.7, 127.3, 126.1, 120.2, 120.1, 120.1, 21.1.

HRMS (ESI): calcd for C22H17N3O2 (M+H)+ 356,1394, found 356.1396.

## (*E*)-5-((4-Methoxyphenyl)imino)-1,3-diphenylimidazolidine-2,4-dione (2f)

1H NMR (400 MHz, DMSO-d6) δ 7.58 – 7.54 (m, 4H, Ar), 7.52 (d, *J* = 7.6 Hz, 2H, Ar), 7.48 – 7.44 (m, 4H, Ar), 7.02 (d, *J* = 8.7 Hz, 2H, Ar), 6.84 (d, *J* = 8.8 Hz, 2H, Ar), 3.72 (s, 3H, OCH3).

13C NMR (101 MHz, DMSO-d6) δ 156.4, 153.9, 152.4, 140.7, 139.0, 132.5, 131.0, 129.0, 128.9, 128.5, 128.2, 127.9, 127.0, 122.3, 113.5, 55.2.

HRMS (ESI): calcd for C22H17N3O3 (M+H)+ 372.1343, found 372.1347.

## (*E*)-5-((4-Nitrophenyl)imino)-1,3-diphenylimidazolidine-2,4-dione (2g)

1H NMR (400 MHz, CDCl3) δ 8.19 (s, 2H, Ar), 7.57 (m, 3H, Ar), 7.52 – 7.38 (m, 7H, Ar), 7.03 (s, 2H, Ar).

13C NMR (101 MHz, CDCl3) δ 153.4, 152.8, 152.0, 144.5, 140.3, 131.1, 130.0, 129.5, 129.4, 129.2, 129.1, 127.1, 125.8, 124.8, 120.2.

HRMS (ESI): calcd for C21H14N4O4 (M+H)+ 409.0907, found 409.0911.

## (*E*)-5-((4-bromophenyl)imino)-1,3-diphenyl-2-thioxoimidazolidin-4-one (2h)

1H NMR (400 MHz, CDCl3) δ 7.60 – 7.55 (m, 2H, Ar), 7.50 (q, *J* = 9.2, 8.3 Hz, 6H, Ar), 7.43 – 7.36 (m, 4H, Ar), 6.91 (d, *J* = 8.3 Hz, 2H, Ar).

13C NMR (101 MHz, CDCl3) δ 179.2, 153.1, 144.5, 133.8, 132.0, 131.7, 129.8, 129.7, 129.5, 129.4, 128.9, 128.3, 125.4, 122.4, 118.7.

HRMS (ESI): calcd for C22H17N3O2S (2M+Na)+ 797.1975, found 797.1986.


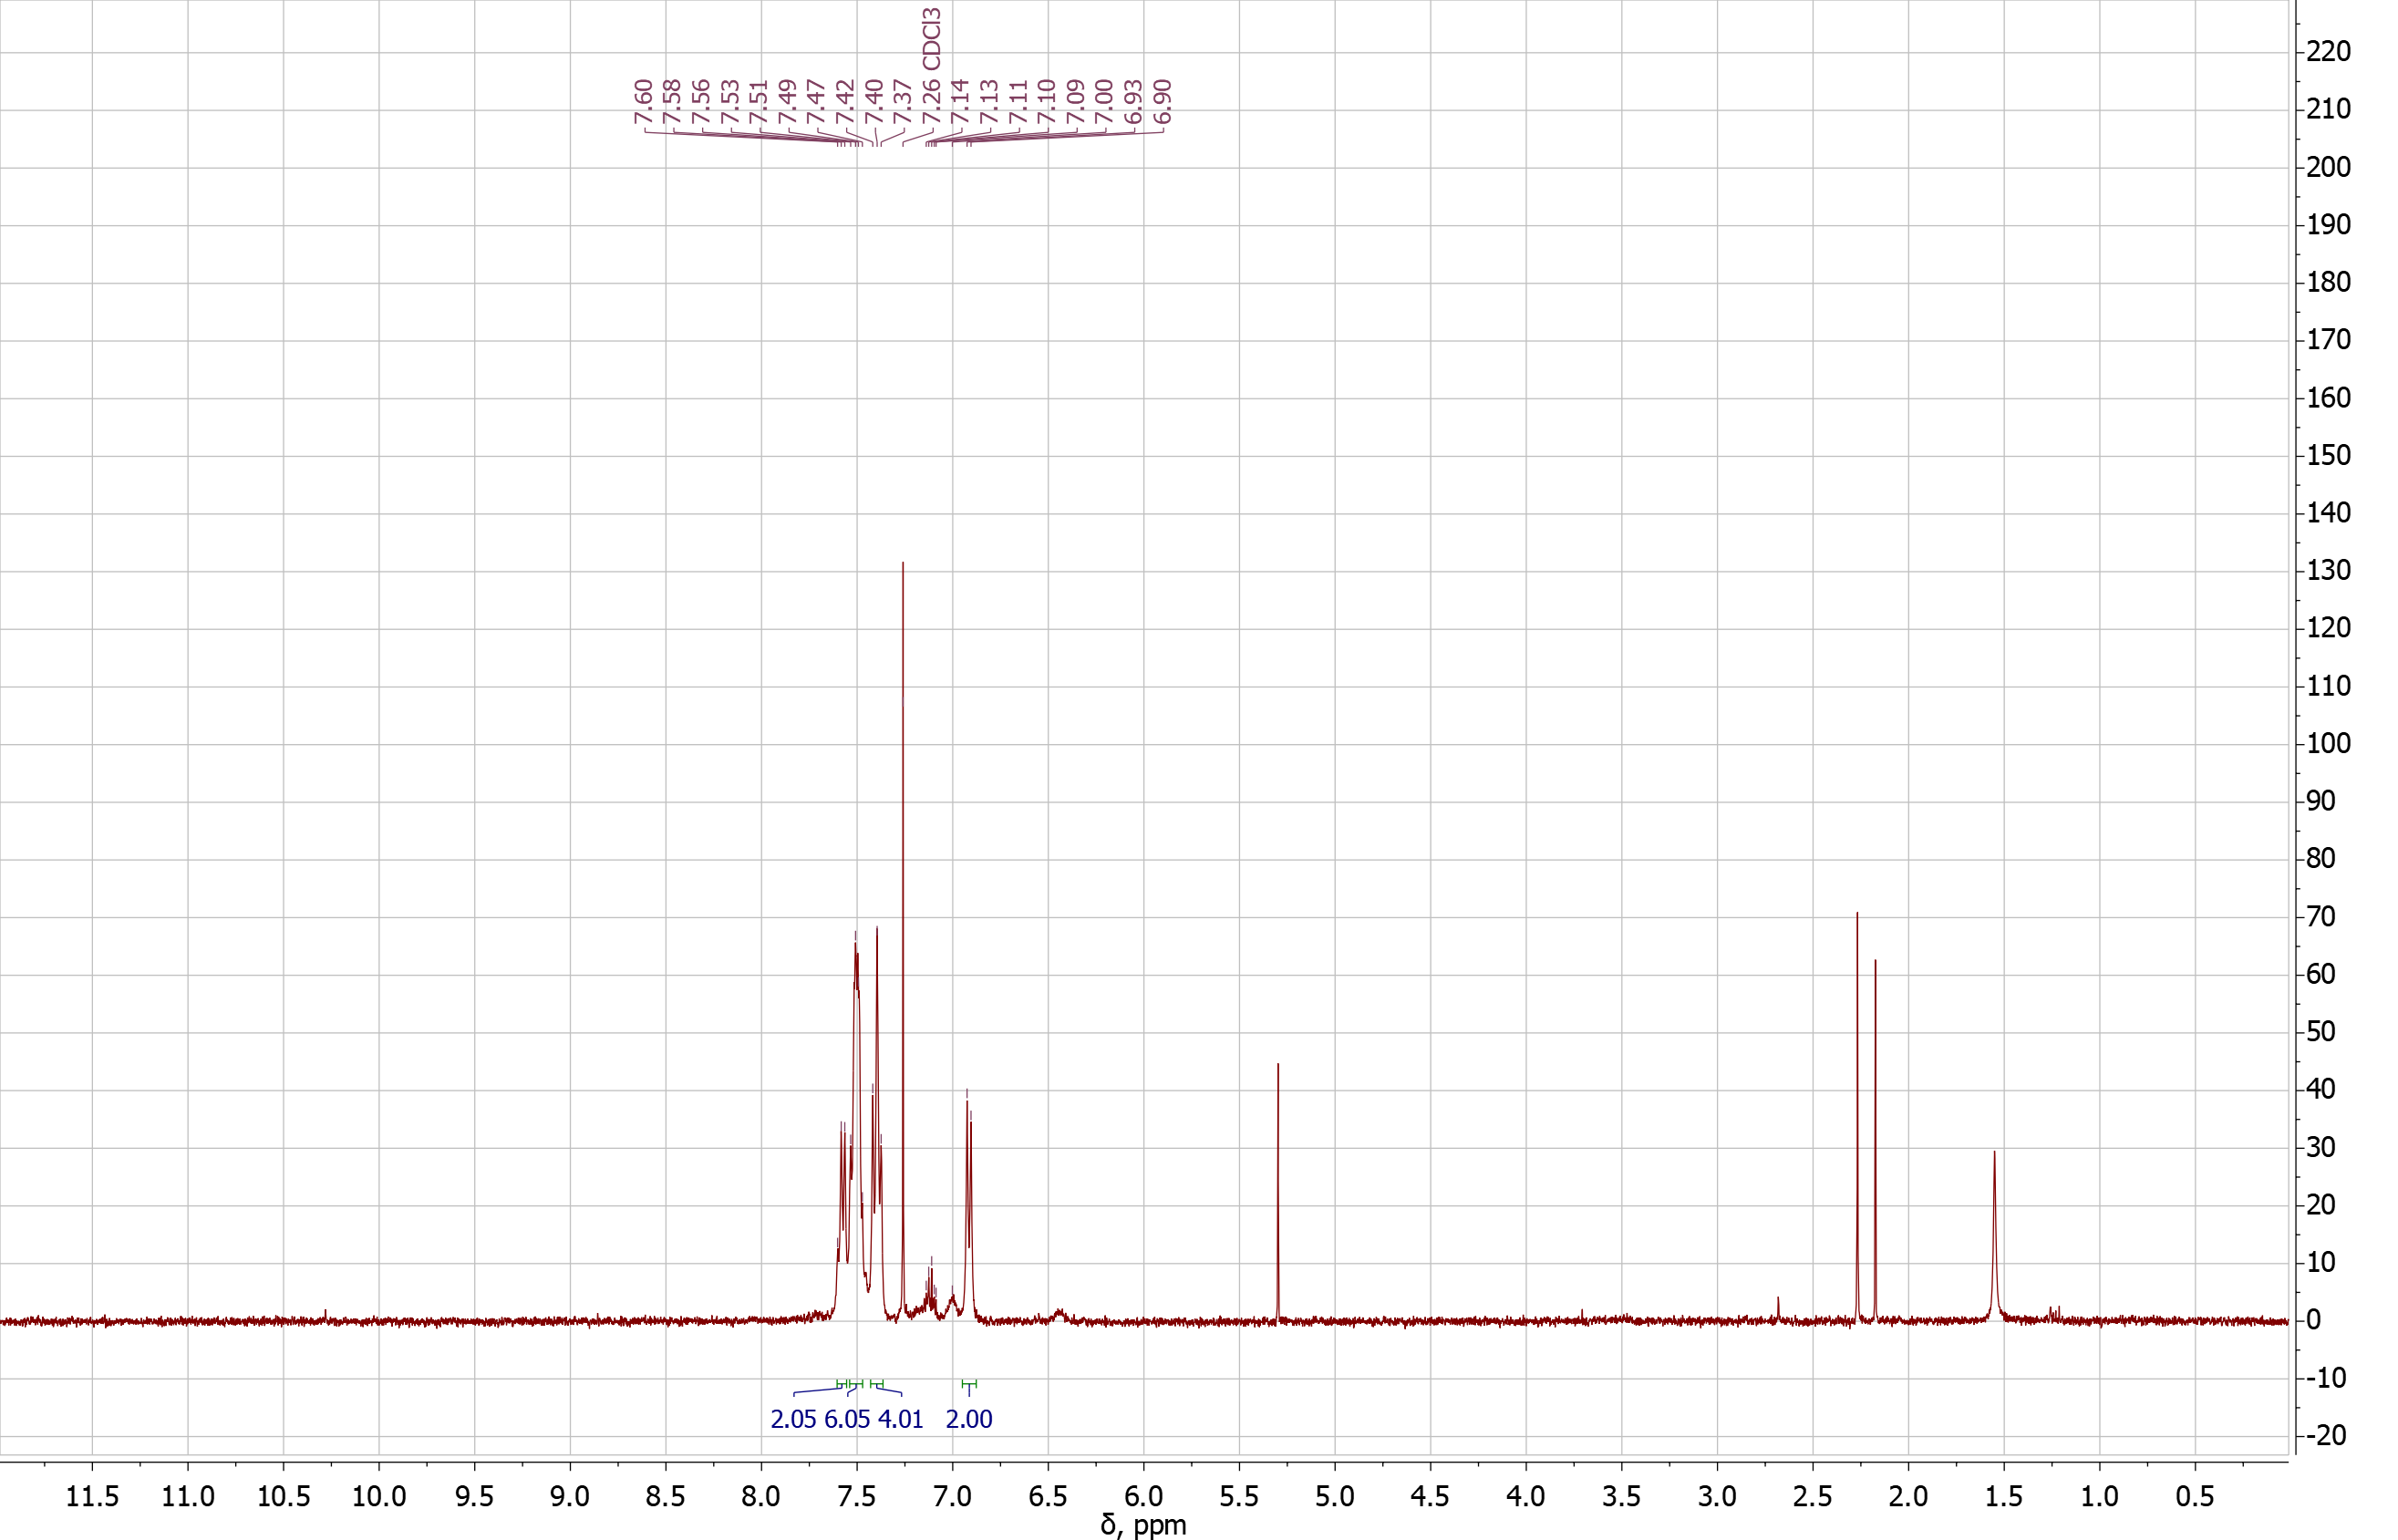


## (*E*)-5-((4-Methoxyphenyl)imino)-1,3-diphenyl-2-thioxoimidazolidin-4-one (2i)

1H NMR (400 MHz, CDCl3) δ 7.58 – 7.53 (m, 2H, Ar), 7.53 – 7.46 (m, 6H, Ar), 7.40 (d, *J* = 7.4 Hz, 2H, Ar), 7.17 (d, *J* = 6.5 Hz, 2H, Ar), 6.83 (d, *J* = 6.6 Hz, 2H, Ar), 3.78 (s, 3H, OCH3).

13C NMR (101 MHz, CDCl3) δ 178.9, 158.3, 153.1, 139.3, 137.6, 134.2, 132.3, 129.6, 129.3, 129.0, 128.4, 123.9, 113.7, 55.5.

HRMS (ESI): calcd for (M+H)+ 388.1114, found 388.1122.

## (*E*)-5-((4-Nitrophenyl)imino)-1,3-diphenyl-2-thioxoimidazolidin-4-one (2j)

1H NMR (400 MHz, CDCl3) δ 8.19 (s, 2H, Ar), 7.64 – 7.46 (m, 8H, Ar), 7.41 (d, *J* = 7.4 Hz, 2H, Ar), 7.08 (s, 2H, Ar).

13C NMR (101 MHz, CDCl3) δ 179.2, 152.3, 144.6, 141.1, 133.3, 131.8, 129.8, 129.5, 129.4, 128.7, 128.1, 124.6, 120.4.

HRMS (ESI): calcd for C21H14N4O3S (M+H)+ 403.0859, found 403.0864.

## Ethyl (*E*)-2-(5-((4-bromophenyl)imino)-2,4-dioxo-3-phenylimidazolidin-1-yl)acetate (2k)

1H NMR (400 MHz, CDCl3) δ 7.48 – 7.43 (m, 3H, Ar), 7.43 – 7.37 (m, 4H, Ar), 6.92 – 6.87 (m, 2H, Ar), 4.59 (s, 2H, NCH2), 4.29 (q, *J* = 7.2 Hz, 2H, COOCH2), 1.33 (t, *J* = 7.1 Hz, 3H, CH3).

13C NMR (101 MHz, CDCl3) δ 166.8, 153.5, 152.6, 144.6, 139.3, 131.8, 130.2, 129.3, 128.9, 125.9, 122.3, 118.5, 62.3, 40.7, 14.3.

HRMS (ESI): calcd for C19H16BrN3O4 (M+Na)+ 452.0216, found 452.0222.

## Ethyl (*E*)-2-(4-((4-bromophenyl)imino)-2,5-dioxo-3-phenylimidazolidin-1-yl)acetate (2l)

1H NMR (400 MHz, CDCl3) δ 7.54 – 7.48 (m, 4H, Ar), 7.46 – 7.39 (m, 3H, Ar), 6.84 (d, *J* = 8.5 Hz, 2H, Ar), 4.38 (s, 2H, NCH2), 4.25 (q, *J* = 7.1 Hz, 2H, COOCH2), 1.30 (t, *J* = 7.1 Hz, 3H, CH3).

13C NMR (101 MHz, CDCl3) δ 166.4, 153.9, 152.4, 144.9, 140.3, 131.8, 131.3, 129.4, 128.9, 127.2, 122.0, 118.3, 62.5, 39.7, 14.2.

HRMS (ESI): calcd for C19H16BrN3O4 (M+Na)+ 452.0216, found 452.0220.

# 1H, 13C NMR and HRMS spectral data of 4-thia-1,2,6,9-tetraazaspiro[4.4]non-2-ene-7,8-diones **4a-g**

## 3-(4-Chloro-3-nitrophenyl)-1,6,9-triphenyl-4-thia-1,2,6,9-tetraazaspiro[4.4]non-2-ene-7,8-dione (4a)

1H NMR (400 MHz, DMSO-d6) δ 8.12 (dd, *J* = 1.9, 0.7 Hz, 1H, Ar), 7.72 – 7.66 (m, 2H, Ar), 7.52 (dd, *J* = 8.8, 7.3 Hz, 2H, Ar), 7.42 (m, 8H, Ar), 7.27 – 7.20 (m, 5H, Ar).

13C NMR (101 MHz, DMSO-d6) δ 156.3, 148.1, 140.5, 139.4, 132.8, 132.3, 130.1, 130.1, 129.8, 129.5, 129.4, 127.7, 125.8, 124.3, 121.9, 117.4, 112.1.

HRMS (ESI): calcd for C28H18ClN5O4S (M+H)+ 578.0660, found 578.0665.

## 1-(4-Nitrophenyl)-3,6,9-triphenyl-4-thia-1,2,6,9-tetraazaspiro[4.4]non-2-ene-7,8-dione (4b)

1H NMR (400 MHz, CDCl3) δ 8.33 – 8.27 (m, 2H, Ar), 7.55 – 7.51 (m, 2H, Ar), 7.46 – 7.42 (m, 2H, Ar), 7.42 – 7.33 (m, 9H, Ar), 7.25 – 7.20 (m, 4H, Ar).

13C NMR (101 MHz, CDCl3) δ 155.0, 151.7, 148.8, 145.2, 144.4, 131.4, 130.0, 130.0, 129.2, 126.6, 124.9, 124.7, 120.8, 120.8.

HRMS (ESI): calcd for C28H19N5O4S (M+H)+ 522.1231, found 522.1226.

## 3-(4-Bromophenyl)-1,6,9-triphenyl-4-thia-1,2,6,9-tetraazaspiro[4.4]non-2-ene-7,8-dione (4c)

1H NMR (400 MHz, CDCl3) δ 7.46 – 7.42 (m, 2H, Ar), 7.42 – 7.37 (m, 2H, Ar), 7.36 – 7.31 (m, 8H, Ar), 7.30 – 7.27 (m, 2H, Ar), 7.26 – 7.19 (m, 5H, Ar).

13C NMR (101 MHz, CDCl3) δ 155.78, 140.64, 140.00, 132.55, 132.00, 129.99, 129.65, 129.51, 128.98, 127.55, 127.52, 124.79, 124.43, 118.21, 112.00.

HRMS (ESI): calcd for C28H19BrN4O2S (M+H)+ 555.0485, found 555.0487.

## 3-Methyl-1,6,9-triphenyl-4-thia-1,2,6,9-tetraazaspiro[4.4]non-2-ene-7,8-dione (4d)

1H NMR (400 MHz, CDCl3) δ 7.39 – 7.32 (m, 8H, Ar), 7.26 – 7.20 (m, 6H, Ar), 7.14 (t, *J* = 7.3 Hz, 1H, Ar), 2.00 (s, 3H, CH3).

13C NMR (101 MHz, CDCl3) δ 155.8, 140.9, 139.2, 132.8, 129.9, 129.6, 129.4, 127.6, 124.1, 117.7, 112.0, 16.5.

HRMS (ESI): calcd for C23H18N4O2S (2M+Na)+ 851.2193, found 851.2186.

## Ethyl 2-(3-(4-bromophenyl)-9-(4-ethoxyphenyl)-7,8-dioxo-1-phenyl-4-thia-1,2,6,9-tetraazaspiro[4.4]non-2-en-6-yl)acetate (4e)

1H NMR (400 MHz, CDCl3) δ 7.48 (d, *J* = 8.5 Hz, 2H, Ar), 7.39 – 7.32 (m, 4H, Ar), 7.24 (d, *J* = 8.4 Hz, 2H, Ar), 7.18 (t, *J* = 7.3 Hz, 1H, Ar), 7.08 (d, *J* = 9.0 Hz, 2H, Ar), 6.79 (d, *J* = 9.0 Hz, 2H, Ar), 4.31 (d, *J* = 17.6 Hz, 1H, NCH2), 4.28 – 4.13 (m, 2H, COOCH2CH3), 4.01 – 3.90 (m, 3H, NCH2+OCH2CH3), 1.34 (t, *J* = 7.0 Hz, 3H, OCH2CH3), 1.24 (t, *J* = 7.1 Hz, 3H, COOCH2CH3).

13C NMR (101 MHz, CDCl3) δ 166.1, 159.6, 156.4, 155.4, 140.4, 140.0, 132.1, 129.9, 129.0, 128.9, 127.6, 125.2, 124.5, 124.2, 118.8, 115.2, 111.0, 63.7, 62.4, 41.9, 14.7, 14.1.

HRMS (ESI): calcd for C28H25BrN4O5S (M+H)+ 609.0802, found 609.0803.

## Ethyl 2-(9-(4-methoxyphenyl)-1-(4-nitrophenyl)-7,8-dioxo-3-phenyl-4-thia-1,2,6,9-tetraazaspiro[4.4]non-2-en-6-yl)acetate (4f)

1H NMR (400 MHz, CDCl3) δ 8.25 (d, *J* = 9.3 Hz, 2H, Ar), 7.58 – 7.52 (m, 2H, Ar), 7.47 – 7.39 (m, 5H, Ar), 7.03 (d, *J* = 9.0 Hz, 2H, Ar), 6.82 (d, *J* = 9.0 Hz, 2H, Ar), 4.39 (d, *J* = 17.5 Hz, 1H, NCH2), 4.20 (qq, *J* = 10.8, 7.1 Hz, 2H, COOCH2CH3), 4.06 (d, *J* = 17.5 Hz, 1H, NCH2), 3.74 (s, 3H, OCH3), 1.24 (t, *J* = 7.1 Hz, 3H, COOCH2CH3).

13C NMR (101 MHz, CDCl3) δ 165.8, 160.5, 145.7, 131.4, 129.4, 129.2, 129.0, 126.7, 125.7, 123.8, 117.0, 115.1, 110.6, 62.6, 55.6, 42.1, 14.2.

HRMS (ESI): calcd for C27H23N5O7S (M+Na)+ 584.1210, found 584.1217.

## 6-Allyl-1-(4-nitrophenyl)-3-phenyl-4-thia-1,2,6,9-tetraazaspiro[4.4]non-2-ene-7,8-dione (4g)

1H NMR (400 MHz, CDCl3) δ 8.53 – 8.39 (m, 4H, Ar), 7.96 – 7.91 (m, 2H, Ar), 7.62 – 7.53 (m, 3H, Ar), 7.51 – 7.44 (m, 1H, NH), 5.90 (ddt, *J* = 17.2, 10.2, 5.6 Hz, 1H, CH), 5.29 – 5.18 (m, 2H, =CH2), 4.06 – 4.00 (m, 2H, NCH2).

13C NMR (101 MHz, CDCl3) δ 168.9, 167.4, 160.2, 158.2, 146.7, 143.6, 133.4, 133.4, 132.4, 129.6, 128.8, 127.1, 124.9, 124.7, 117.1, 42.2.

HRMS (ESI): calcd for C19H15N5O4S (2M+Na)+ 841.1582, found 841.1582.

# 1H, 13C NMR and HRMS spectral data of 1,2,4,6,8-pentaazaspiro[4.4]non-2-ene-7,9-diones **5a-n**

## 4-(4-Bromophenyl)-1,3,6,8-tetraphenyl-1,2,4,6,8-pentaazaspiro[4.4]non-2-ene-7,9-dione (5a)

1H NMR (400 MHz, CDCl3) δ 7.53 – 7.50 (m, 2H, Ar), 7.47 – 7.42 (m, 3H, Ar), 7.42 – 7.38 (m, 3H, Ar), 7.38 – 7.35 (m, 4H, Ar), 7.35 – 7.26 (m, 7H, Ar), 7.15 – 7.11 (m, 2H, Ar), 7.07 – 7.02 (m, 1H, Ar), 6.98 – 6.93 (m, 2H, Ar).

13C NMR (101 MHz, CDCl3) δ 165.0, 151.8, 146.6, 141.4, 135.7, 133.9, 132.9, 130.6, 130.0, 129.7, 129.5, 129.5, 129.0, 128.7, 128.6, 127.9, 127.6, 126.3, 126.1, 124.9, 122.7, 121.9, 115.6, 97.5.

HRMS (ESI): calcd for C34H24BrN5O2 (M+H)+ 614.1186, found 614.1193.

## 1,4-Bis(4-nitrophenyl)-6,8-diphenyl-3-(p-tolyl)-1,2,4,6,8-pentaazaspiro[4.4]non-2-ene-7,9-dione (5b)

1H NMR (400 MHz, CDCl3) δ 8.28 – 8.23 (m, 2H, Ar), 8.20 – 8.16 (m, 2H, Ar), 7.52 – 7.44 (m, 3H, Ar), 7.39 – 7.34 (m, 4H, Ar), 7.33 – 7.27 (m, 3H, Ar), 7.25 – 7.18 (m, 6H, Ar), 7.13 (d, *J* = 8.1 Hz, 2H, Ar), 2.35 (s, 3H, CH3).

13C NMR (101 MHz, CDCl3) δ 164.0, 151.3, 147.8, 146.5, 145.5, 142.1, 141.9, 141.8, 132.8, 130.1, 130.0, 129.9, 129.8, 129.6, 128.6, 128.0, 126.6, 126.1, 125.7, 125.2, 125.1, 122.2, 113.6, 95.5, 21.6.

HRMS (ESI): calcd for C35H25N7O6 (M+Na)+ 662.1759, found 662.1765.

## 4-(4-Bromophenyl)-1-(4-nitrophenyl)-6,8-diphenyl-3-(p-tolyl)-1,2,4,6,8-pentaazaspiro[4.4]non-2-ene-7,9-dione (5c)

1H NMR (400 MHz, DMSO-d6) δ 8.34 (d, *J* = 9.4 Hz, 2H, Ar), 7.69 (d, *J* = 8.7 Hz, 2H, Ar), 7.55 – 7.50 (m, 3H, Ar), 7.49 – 7.43 (m, 4H, Ar), 7.39 – 7.35 (m, 3H, Ar), 7.33 (d, *J* = 8.2 Hz, 2H, Ar), 7.23 – 7.17 (m, 4H, Ar), 7.15 (d, *J* = 8.6 Hz, 2H, Ar), 2.29 (s, 3H,CH3).

13C NMR (101 MHz, DMSO-d6) δ 163.5, 148.2, 145.2, 140.7, 135.0, 133.1, 132.5, 129.9, 129.9, 129.8, 129.6, 129.5, 128.9, 128.8, 128.6, 127.9, 126.8, 126.5, 126.1, 122.1, 121.5, 113.1, 95.3, 21.0.

HRMS (ESI): calcd for C35H25BrN6O4 (M+Na)+ 695.1013, found 695.1015.

## 4-(2-Bromophenyl)-1-(4-nitrophenyl)-6,8-diphenyl-3-(p-tolyl)-1,2,4,6,8-pentaazaspiro[4.4]non-2-ene-7,9-dione (5d)

Isomer I:

1H NMR (400 MHz, CDCl3) δ 8.20 – 8.15 (m, 2H, Ar), 7.68 – 7.65 (m, 1H, Ar), 7.53 – 7.49 (m, 2H, Ar), 7.47 – 7.41 (m, 5H, Ar), 7.29 – 7.24 (m, 2H, Ar), 7.23 – 7.17 (m, 4H, Ar), 7.17 – 7.11 (m, 6H, Ar), 2.34 (s, 3H, CH3).

13C NMR (101 MHz, CDCl3) δ 163.6, 151.6, 150.0, 145.8, 141.4, 141.3, 137.1, 134.2, 133.5, 133.2, 130.6, 130.5, 129.7, 129.6, 129.4, 129.2, 128.7, 127.8, 127.7, 126.0, 125.9, 125.1, 123.3, 122.9, 113.2, 96.2, 21.6.

HRMS (ESI): calcd for C35H25BrN6O4 (M+Na)+ 695.1013, found 695.1016.

Isomer II:

1H NMR (400 MHz, CDCl3) δ 8.24 – 8.19 (m, 2H, Ar), 7.60 – 7.55 (m, 2H, Ar), 7.45 – 7.39 (m, 6H, Ar), 7.34 – 7.27 (m, 5H, Ar), 7.26 – 7.21 (m, 3H, Ar), 7.10 – 7.04 (m, 4H, Ar), 2.33 (s, 3H, CH3).

13C NMR (101 MHz, CDCl3) δ 163.5, 151.5, 149.0, 145.6, 141.3, 141.1, 135.6, 134.9, 133.4, 130.8, 130.4, 129.8, 129.6, 129.5, 129.3, 128.9, 128.8, 128.0, 127.3, 126.1, 126.0, 125.1, 124.6, 124.1, 113.3, 95.5, 21.7.

HRMS (ESI): calcd for C35H25BrN6O4 (M+Na)+ 695.1013, found 695.1022.

## 4-(2-Chlorophenyl)-1-(4-nitrophenyl)-6,8-diphenyl-3-(p-tolyl)-1,2,4,6,8-pentaazaspiro[4.4]non-2-ene-7,9-dione (5e)

1H NMR (400 MHz, DMSO-d6) δ 8.33 (d, *J* = 9.3 Hz, 2HII, Ar), 8.28 (d, *J* = 9.2 Hz, 2HI, Ar), 7.88 (d, *J* = 7.8 Hz, 1HII, Ar), 7.71 – 7.64 (m, 1HI+1HII, Ar), 7.56 – 7.45 (m, 5HI+7HII, Ar), 7.44-7.35 (m, 3HI+3HII, Ar), 7.35-7.30 (m, 5HI+4HII, Ar), 7.29-7.26 (m, 1HI, Ar), 7.23 (d, *J* = 8.0 Hz, 2HI, Ar), 7.19-7.12 (m, 3HI+2HII, Ar), 7.06 – 7.02 (m, 2HII, Ar), 2.29 (s, 3HI+3HII, CH3).

13C NMR (101 MHz, DMSO-d6) δ 163.1, 163.0, 150.9, 150.7, 149.4, 148.7, 145.2, 145.0, 141.2, 141.0, 140.6, 140.5, 134.4, 133.1, 132.9, 132.6, 131.9, 131.7, 131.7, 131.3, 131.1, 130.9, 130.0, 129.8, 129.5, 129.5, 129.4, 129.3, 129.3, 128.8, 128.7, 128.6, 127.9, 127.3, 126.9, 126.8, 126.7, 126.5, 126.3, 126.0, 125.1, 123.4, 122.7, 113.1, 113.1, 113.0, 95.8, 95.1, 40.2, 40.0, 39.7, 39.5, 39.3, 39.1, 38.9, 21.0, 20.8.

HRMS (ESI): calcd for C35H25ClN6O4 (M+Na)+ 651.1518, found 651.1527.

## 1-(4-Nitrophenyl)-6,8-diphenyl-3,4-di-p-tolyl-1,2,4,6,8-pentaazaspiro[4.4]non-2-ene-7,9-dione (5f)

1H NMR (400 MHz, DMSO-d6) δ 8.32 (d, *J* = 9.0 Hz, 2H, Ar), 7.52 (d, *J* = 8.0 Hz, 3H, Ar), 7.46 (dd, *J* = 14.1, 6.4 Hz, 4H, Ar), 7.39 – 7.31 (m, 5H, Ar), 7.28 (d, *J* = 7.9 Hz, 2H, Ar), 7.18 (d, *J* = 7.9 Hz, 2H, Ar), 7.07 (d, *J* = 7.6 Hz, 4H, Ar), 2.32 (s, 3H, CH3), 2.28 (s, 3H, CH3).

13C NMR (101 MHz, DMSO-d6) δ 163.7, 150.8, 148.7, 145.4, 140.8, 140.5, 138.6, 132.8, 132.8, 130.5, 130.0, 129.7, 129.4, 129.4, 128.3, 127.8, 127.1, 126.8, 126.4, 125.6, 122.4, 112.9, 95.6, 20.9, 20.6.

HRMS (ESI): calcd for C36H28N6O4 (M+Na)+ 631.2064, found 631.2072.

## 4-(4-Methoxyphenyl)-1-(4-nitrophenyl)-6,8-diphenyl-3-(p-tolyl)-1,2,4,6,8-pentaazaspiro[4.4]non-2-ene-7,9-dione (5g)

1H NMR (400 MHz, DMSO-d6) δ 8.31 (d, *J* = 9.5 Hz, 2H, Ar), 7.55 – 7.50 (m, 3H, Ar), 7.50 – 7.43 (m, 4H, Ar), 7.39 – 7.31 (m, 5H, Ar), 7.19 (d, *J* = 7.5 Hz, 2H, Ar), 7.13 (d, *J* = 8.4 Hz, 2H, Ar), 7.10 – 7.06 (m, 2H, Ar), 7.04 (d, *J* = 9.3 Hz, 2H, Ar), 3.76 (s, 3H, OCH3), 2.28 (s, 3H, CH3).

13C NMR (101 MHz, DMSO-d6) δ 163.8, 159.3, 150.9, 148.9, 145.4, 140.9, 140.4, 133.0, 130.0, 129.7, 129.5, 129.4, 129.4, 129.1, 128.2, 127.8, 127.6, 126.8, 126.4, 125.3, 122.3, 115.2, 112.9, 95.8, 55.6, 21.0.

HRMS (ESI): calcd for C36H28N6O5 (M+H)+ 625.2194, found 625.2199.

## 4-(4-Bromophenyl)-1-(4-nitrophenyl)-3,6,8-triphenyl-1,2,4,6,8-pentaazaspiro[4.4]non-2-ene-7,9-dione (5h)

1H NMR (400 MHz, CDCl3) δ 8.28 – 8.22 (m, 2H, Ar), 7.50 – 7.46 (m, 3H, Ar), 7.46 – 7.41 (m, 4H, Ar), 7.40 – 7.33 (m, 5H, Ar), 7.30 (m, 5H, Ar), 7.16 – 7.11 (m, 2H, Ar), 6.99 – 6.93 (m, 2H, Ar).

13C NMR (101 MHz, CDCl3) δ 164.3, 151.5, 148.7, 145.7, 141.6, 134.8, 133.3, 133.2, 130.9, 130.2, 129.9, 129.7, 129.5, 129.0, 128.9, 128.2, 128.1, 126.1, 126.0, 125.4, 124.7, 122.8, 113.3, 96.0.

HRMS (ESI): calcd for C34H23BrN6O4 (M+Na)+ 681.0856, found 681.0853.

## 4-(4-Methoxyphenyl)-1-(4-nitrophenyl)-3,6,8-triphenyl-1,2,4,6,8-pentaazaspiro[4.4]non-2-ene-7,9-dione (5i)

1H NMR (400 MHz, DMSO-d6) δ 8.34 – 8.30 (m, 3H, Ar), 7.54 – 7.51 (m, 3H, Ar), 7.50 – 7.48 (m, 2H, Ar), 7.47 – 7.43 (m, 5H, Ar), 7.40 – 7.36 (m, 4H, Ar), 7.14 (d, *J* = 8.6 Hz, 2H, Ar), 7.10 – 7.07 (m, 2H, Ar), 7.04 (d, *J* = 9.1 Hz, 2H, Ar), 3.76 (s, 3H, OCH3).

13C NMR (101 MHz, DMSO-d6) δ 163.9, 159.4, 150.9, 148.9, 145.4, 140.6, 133.0, 130.9, 130.0, 129.8, 129.5, 129.5, 129.1, 128.9, 128.2, 127.9, 127.5, 126.9, 126.4, 125.4, 125.3, 115.3, 113.0, 95.9, 55.6.

HRMS (ESI): calcd for C35H26N6O5 (M+H)+ 611.2037, found 611.2041.

## 3-(4-Chlorophenyl)-1,6,8-triphenyl-4-(p-tolyl)-1,2,4,6,8-pentaazaspiro[4.4]non-2-ene-7,9-dione (5j)

1H NMR (400 MHz, CDCl3) δ 7.53 (d, *J* = 7.7 Hz, 2H, Ar), 7.44 – 7.40 (m, 2H, Ar), 7.40 – 7.34 (m, 4H, Ar), 7.34 – 7.27 (m, 6H, Ar), 7.24 – 7.21 (m, 2H, Ar), 7.13 – 7.09 (m, 4H, Ar), 7.05 – 7.01 (m, 1H, Ar), 6.97 (d, *J* = 8.3 Hz, 2H, Ar), 2.34 (s, 3H, CH3).

13C NMR (101 MHz, CDCl3) δ 165.1, 151.9, 146.2, 141.4, 138.6, 135.8, 134.1, 133.5, 130.7, 130.4, 129.7, 129.4, 129.4, 129.1, 128.9, 128.8, 127.4, 127.3, 126.3, 125.2, 124.9, 122.4, 115.3, 97.8, 21.2.

HRMS (ESI): calcd for C35H26ClN5O2 (M+H)+ 584.1848, found 584.1849.

## 3-Methyl-4-(4-nitrophenyl)-1,6,8-triphenyl-1,2,4,6,8-pentaazaspiro[4.4]non-2-ene-7,9-dione (5k)

1H NMR (400 MHz, CDCl3) δ 8.27 – 8.22 (m, 2H, Ar), 7.46 – 7.37 (m, 7H, Ar), 7.36 – 7.31 (m, 3H, Ar), 7.23 – 7.19 (m, 4H, Ar), 7.15 – 7.11 (m, 2H, Ar), 7.05 (m, 1H, Ar), 2.03 (s, 3H, CH3).

13C NMR (101 MHz, CDCl3) δ 165.5, 151.5, 147.1, 144.1, 141.7, 140.6, 133.9, 130.4, 129.8, 129.6, 129.5, 129.2, 128.1, 127.7, 126.0, 125.3, 124.8, 122.9, 115.9, 96.9, 12.1.

HRMS (ESI): calcd for C29H22N6O4 (M+H)+ 519.1775, found 519.1772.

## 4-(4-Bromophenyl)-3-methyl-1,6,8-triphenyl-1,2,4,6,8-pentaazaspiro[4.4]non-2-ene-7,9-dione (5l)

1H NMR (400 MHz, CDCl3) δ 7.54 – 7.50 (m, 2H, Ar), 7.49 – 7.45 (m, 2H, Ar), 7.45 – 7.36 (m, 5H, Ar), 7.35 – 7.28 (m, 3H, Ar), 7.23 – 7.19 (m, 2H, Ar), 7.15 – 7.10 (m, 2H, Ar), 7.03 – 6.98 (m, 1H, Ar), 6.96 – 6.90 (m, 2H, Ar), 1.93 (s, 3H, CH3).

13C NMR (101 MHz, CDCl3) δ 165.9, 151.6, 145.4, 142.0, 134.3, 133.3, 133.2, 130.6, 130.6, 129.7, 129.4, 129.0, 127.2, 126.2, 124.6, 123.4, 122.3, 115.3, 97.1, 11.6.

HRMS (ESI): calcd for C29H22BrN5O2 (M+H)+ 552.1030, found 552.1023.

## Ethyl 2-(4-(4-bromophenyl)-1-(4-nitrophenyl)-7,9-dioxo-3,8-diphenyl-1,2,4,6,8-pentaazaspiro[4.4]non-2-en-6-yl)acetate (5m)

1H NMR (400 MHz, CDCl3) δ 8.23 (d, *J* = 9.2 Hz, 2H, Ar), 7.51 – 7.47 (m, 3H, Ar), 7.46 – 7.43 (m, 2H, Ar), 7.42 – 7.40 (m, 2H, Ar), 7.37 – 7.33 (m, 3H, Ar), 7.29 (d, *J* = 9.2 Hz, 2H, Ar), 7.22 (d, *J* = 8.1 Hz, 2H, Ar), 7.09 – 7.02 (m, 2H, Ar), 4.32 (d, *J* = 17.6 Hz, 1H, NCH2), 4.21 – 4.07 (m, 3H, NCH2+COOCH2CH3), 1.19 (t, *J* = 7.1 Hz, 3H, COOCH2CH3).

13C NMR (101 MHz, CDCl3) δ 167.4, 164.0, 152.4, 148.8, 146.0, 141.8, 135.6, 133.1, 131.0, 130.1, 129.6, 129.3, 128.9, 128.7, 128.2, 125.9, 125.7, 125.5, 122.5, 113.7, 95.4, 62.3, 41.0, 14.1.

HRMS (ESI): calcd for C32H25BrN6O6 (M+Na)+ 691.0911, found 691,0913.

## Ethyl 2-(4-(4-bromophenyl)-1-(4-nitrophenyl)-7,9-dioxo-3,6-diphenyl-1,2,4,6,8-pentaazaspiro[4.4]non-2-en-8-yl)acetate (5n)

1H NMR (400 MHz, DMSO-d6) δ 8.24 – 8.19 (m, 2H, Ar), 7.60 – 7.56 (m, 2H, Ar), 7.46 – 7.41 (m, 2H, Ar), 7.41 – 7.37 (m, 5H, Ar), 7.37 – 7.31 (m, 3H, Ar), 7.30 – 7.26 (m, 2H, Ar), 7.03 – 6.97 (m, 2H, Ar), 4.56 – 4.45 (m, 2H, NCH2), 4.20 (qd, *J* = 7.0, 1.4 Hz, 2H, COOCH2CH3), 1.21 (t, *J* = 7.1 Hz, 3H, COOCH2CH3).

13C NMR (101 MHz, DMSO-d6) δ 167.0, 164.1, 151.1, 148.3, 144.9, 140.7, 134.3, 132.9, 132.3, 130.9, 129.8, 129.0, 128.8, 128.5, 127.9, 126.0, 125.7, 125.0, 121.4, 113.5, 95.3, 61.9, 14.0.

HRMS (ESI): calcd for C32H25BrN6O6 (M+Na)+ 691.0911, found 691.0913.

# 1H NMR spectral data of **compounds 5 and 6**

## (Z)-3-Phenyl-2-(phenylimino)thiazolidine-4,5-dione (5)

1H NMR (400 MHz, CDCl3) δ 7.60 – 7.53 (m, 2H, Ar), 7.53 – 7.48 (m, 1H, Ar), 7.48 – 7.42 (m, 2H, Ar), 7.39 – 7.32 (m, 2H, Ar), 7.23 – 7.18 (m, 1H, Ar), 6.94 – 6.89 (m, 2H, Ar).

## (Z)-3-(4-nitrophenyl)-N,5-diphenyl-1,3,4-thiadiazol-2(3H)-imine (6)

1H NMR (400 MHz, CDCl3) δ 8.55 – 8.50 (m, 2H, Ar), 8.35 – 8.30 (m, 2H, Ar), 7.76 – 7.70 (m, 2H, Ar), 7.50 – 7.40 (m, 5H, Ar), 7.23 – 7.17 (m, 1H, Ar), 7.12 – 7.07 (m, 2H, Ar).

# IR spectral data of 1c, 2i, 2j and 5

## 1,3-Diphenyl-2-thioxoimidazolidine-4,5-dione (1c)

## 5-((4-Methoxyphenyl)imino)-1,3-diphenyl-2-thioxoimidazolidin-4-one (2i)

## 5-((4-Nitrophenyl)imino)-1,3-diphenyl-2-thioxoimidazolidin-4-one (2j)

## 3-Phenyl-2-(phenylimino)thiazolidine-4,5-dione (5)

# Crystallographic data of 5c, 5g and 5i

Temperature: 295(2) K

Wavelength: 1.54186 Å

Refinement method: Full-matrix least-squares on F2

| # | **5c** | **5g** | **5i** |
| --- | --- | --- | --- |
| Empirical formula | C35H25BrN6O4 | C36H28N6O5 | C36H27Cl3N6O5 |
| Formula weight | 673.52 | 624.64 | 729.98 |
| Crystal system | Triclinic | Monoclinic | Monoclinic |
| Space group | P -1 | P 21/n | P 21/n |
| a, Å | 10.7603(3) | 16.2888(6) | 11.3803(5) |
| b, Å | 11.0967(3) | 12.3447(3) | 20.6633(8) |
| c, Å | 15.1828(4) | 16.4893(6) | 15.5580(8) |
| α, ° | 93.286(3) | 90 | 90 |
| β, ° | 94.472(3) | 104.864(3) | 108.201(3) |
| γ, ° | 98.835(3) | 90 | 90 |
| *V*, Å3 | 1781.50(9) | 3204.72(19) | 3475.5(3) |
| Z | 2 | 4 | 4 |
| *dcalc*, Mg/m3 | 1.256 | 1.295 | 1.395 |
| Absorption coefficient, mm-1 | 1.933 | 0.726 | 2.823 |
| F(000) | 688 | 1304 | 1504 |
| Theta range for data collection, ° | 2.927 to 67.410 | 4.425 to 67.584 | 4.246 to 67.625 |
| Index ranges | -12<=h<=3  -13<=k<=13  -17<=l<=18 | -19<=h<=19  -10<=k<=14  -15<=l<=19 | -8<=h<=13  -24<=k<=23  -18<=l<=18 |
| Reflections collected | 7618 | 23681 | 25638 |
| Independent reflections [Rint] | 5047 [0.0689] | 5748 [0.0915] | 6196 [0.0802] |
| Completeness to θ = 66.511°, % | 78.8 | 99.2 | 98.6 |
| Data / restraints / parameters | 5047 / 0 / 417 | 5748 / 0 / 427 | 6196 / 0 / 452 |
| Goodness-of-fit on F2 | 0.907 | 0.716 | 0.894 |
| Final R indices [I > 2σ(I)] | R1 = 0.0444  wR2 = 0.1144 | R1 = 0.0403  wR2 = 0.0729 | R1 = 0.0799  wR2 = 0.2182 |
| R indices (all data) | R1 = 0.0646  wR2 = 0.1212 | R1 = 0.1220  wR2 = 0.0872 | R1 = 0.1639  wR2 = 0.2552 |
| Extinction coefficient | 0.0019(3) | 0.00097(6) | 0.0013(3) |
| Largest diff. peak and hole, e. Å -3 | 0.514 and -0.619 | 0.147 and -0.174 | 0.708 and -0.599 |
